# Supplementary material for: Integrin αvβ3 is a coreceptor for human cytomegalovirus
Source: Springer Nature journal article supplement (doi:10.1038/nm1236), 2005-04-17
Supplement: nm1236-S3.pdf [file nm1236-S3.pdf]

## Supplementary Figure 3.

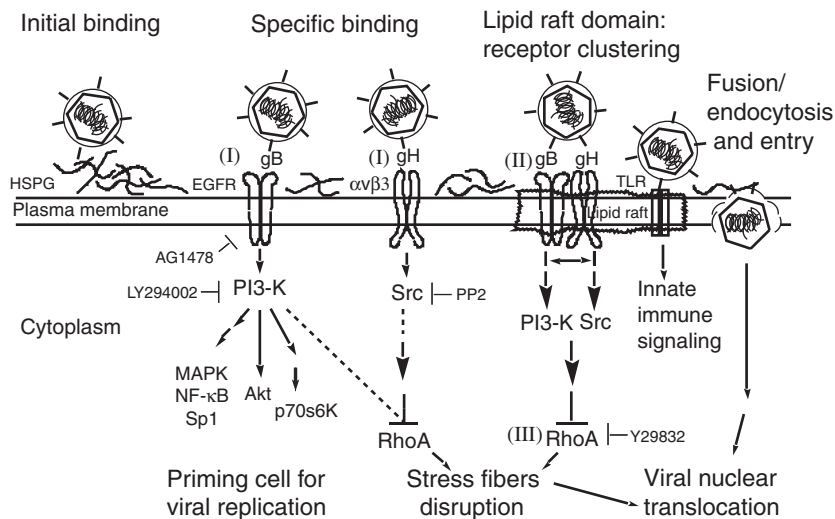

### A proposed model for the initiation of HCMV infection: receptor binding and signaling.

A schematic representation of HCMV binding to its receptors, EGFR and  $\alpha v \beta 3$ . Binding to both receptors elicits coordinated and synergistic signaling from lipid rafts, which is required for viral entry, RhoA downregulation, stress fibers disruption, and viral nuclear trafficking. Please see DISCUSSION for details.
